# Supplementary material
Source: Springer Nature journal article supplement (https://www.springermedizin.de/resource/supplementary/12879_2013_2756_MOESM1_ESM.pdf/9445324)
Supplement: MOESM1 [file 9445324]

**Examined for eligibility**

N=268

**Excluded (51)**

- Metabolic / autoimmune morbidity (N=4)
- Concurrent infection (N=1)
- HPV-negative test (N=46)

**Patients recruited**

N=217

**Lost to follow-up (66)**

- During pregnancy (N=13)
- At postpartum period (N=53)

**Available data for analysis (151)**

- HIV-positive (N=54)
- HIV-negative (N=97)
